# Supplementary material
Source: PubMed Central journal article supplement (PMC9730934)

**Discloser Identifier:** 1006782

**Disclosure Purpose:** 22-11283

## Summary of Interests

I do not have any interests to disclose at this time.

## Additional Questions

**1. Are there other relationships or activities that readers could perceive to have influenced, or that give the appearance of potentially influencing, what you wrote in the submitted work?**

No.

**2. What is the manuscript title?**

Six Months Follow-up of a Fourth BNT162b2 Vaccine Dose

**3. Are you the corresponding author?**

No.

## Certification

I certify that the information provided in this disclosure is complete and accurate.

**Discloser Identifier:** 948655

**Disclosure Purpose:** 22-11283

## Summary of Interests

I do not have any interests to disclose at this time.

## Additional Questions

1. **Are there other relationships or activities that readers could perceive to have influenced, or that give the appearance of potentially influencing, what you wrote in the submitted work?**

No.

2. **What is the manuscript title?**

Six Months Follow-up of a Fourth BNT162b2 Vaccine Dose

3. **Are you the corresponding author?**

No.

## Certification

I certify that the information provided in this disclosure is complete and accurate.

Noam Barda

Discloser Identifier: 1084362

Disclosure Purpose: 22-11283

## Summary of Interests

### Company or Organization

| Entity | Type             | Interest Held By |
|--------|------------------|------------------|
| Pfizer | Grant / Contract | Self             |

*Recipient Name:* Clalit Research Institute

*Grant / Contract Description:* Institutional grants to Sheba Medical Center from Pfizer outside the submitted work

*Additional Information:* Institutional grants to Sheba Medical Center from Pfizer outside the submitted work, with no direct or indirect personal benefits.

*Recipient Type:* Institution

*Grant / Contract Purpose:* Research

## Additional Questions

1. Are there other relationships or activities that readers could perceive to have influenced, or that give the appearance of potentially influencing, what you wrote in the submitted work?

No.

2. What is the manuscript title?

Six Months Follow-up of a Fourth BNT126b2 Vaccine Dose

3. Are you the corresponding author?

No.

## Certification

I certify that the information provided in this disclosure is complete and accurate.

**Discloser Identifier:** 1092282

**Disclosure Purpose:** 22-11283

## Summary of Interests

I do not have any interests to disclose at this time.

## Additional Questions

**1. Are there other relationships or activities that readers could perceive to have influenced, or that give the appearance of potentially influencing, what you wrote in the submitted work?**

No.

**2. What is the manuscript title?**

Six Months Follow-up of a Fourth BNT162b2 Vaccine Dose

**3. Are you the corresponding author?**

No.

## Certification

I certify that the information provided in this disclosure is complete and accurate.

**Discloser Identifier:** 948654

**Disclosure Purpose:** 22-11283

## Summary of Interests

I do not have any interests to disclose at this time.

## Additional Questions

**1. Are there other relationships or activities that readers could perceive to have influenced, or that give the appearance of potentially influencing, what you wrote in the submitted work?**

No.

**2. What is the manuscript title?**

Six Months Follow-up of a Fourth BNT162b2 Vaccine Dose

**3. Are you the corresponding author?**

No.

## Certification

I certify that the information provided in this disclosure is complete and accurate.

Laurence Freedman

**Discloser Identifier:** 399768

**Disclosure Purpose:** 22-11283

## Summary of Interests

I do not have any interests to disclose at this time.

## Additional Questions

**1. Are there other relationships or activities that readers could perceive to have influenced, or that give the appearance of potentially influencing, what you wrote in the submitted work?**

No.

**2. What is the manuscript title?**

Six Months Follow-up of a Fourth BNT162b2 Vaccine Dose

**3. Are you the corresponding author?**

No.

## Certification

I certify that the information provided in this disclosure is complete and accurate.

Mayan Gilboa

Discloser Identifier: 1043673

Disclosure Purpose: 22-11283

## Summary of Interests

I do not have any interests to disclose at this time.

## Additional Questions

1. **Are there other relationships or activities that readers could perceive to have influenced, or that give the appearance of potentially influencing, what you wrote in the submitted work?**

No.

2. **What is the manuscript title?**

Six Months Follow-up of a Fourth BNT162b2 Vaccine Dose NEJM

3. **Are you the corresponding author?**

No.

## Certification

I certify that the information provided in this disclosure is complete and accurate.

**Discloser Identifier:** 1022384

**Disclosure Purpose:** 22-11283

## Summary of Interests

I do not have any interests to disclose at this time.

## Additional Questions

**1. Are there other relationships or activities that readers could perceive to have influenced, or that give the appearance of potentially influencing, what you wrote in the submitted work?**

No.

**2. What is the manuscript title?**

Six Months Follow-up of a Fourth BNT162b2 Vaccine Dose

**3. Are you the corresponding author?**

No.

## Certification

I certify that the information provided in this disclosure is complete and accurate.



Victoria Indenbaum

**Discloser Identifier:** 769581

**Disclosure Purpose:** 22-11283

## Summary of Interests

I do not have any interests to disclose at this time.

## Additional Questions

- 1. Are there other relationships or activities that readers could perceive to have influenced, or that give the appearance of potentially influencing, what you wrote in the submitted work?**

No.

- 2. What is the manuscript title?**

Six Months Follow-up of a Fourth BNT162b2 Vaccine Dose

- 3. Are you the corresponding author?**

No.

## Certification

I certify that the information provided in this disclosure is complete and accurate.

**Discloser Identifier:** 905053

**Disclosure Purpose:** 22-11283

## Summary of Interests

I do not have any interests to disclose at this time.

## Additional Questions

**1. Are there other relationships or activities that readers could perceive to have influenced, or that give the appearance of potentially influencing, what you wrote in the submitted work?**

No.

**2. What is the manuscript title?**

Six Months Follow-up of a Fourth BNT126b2 Vaccine Dose

**3. Are you the corresponding author?**

No.

## Certification

I certify that the information provided in this disclosure is complete and accurate.

Discloser Identifier: 704922

Disclosure Purpose: 22-11283

## Summary of Interests

### Company or Organization

| Entity                                                                                                                                                                                                                                                                                                                                                                                       | Type             | Interest Held By |
|----------------------------------------------------------------------------------------------------------------------------------------------------------------------------------------------------------------------------------------------------------------------------------------------------------------------------------------------------------------------------------------------|------------------|------------------|
| Laboratorios Pfizer Ltda.                                                                                                                                                                                                                                                                                                                                                                    | Grant / Contract | Self             |
| <p><i>Recipient Name:</i> Yaniv Lustig<br/> <i>Grant / Contract Description:</i> The prevalence of Tick Borne Encephalitis (TBE) infection in neurologic patients in Israel<br/> <i>Additional Information:</i> I received a grant from Pfizer on a non related topic (TBE infections in Israel)</p> <p><i>Recipient Type:</i> Individual<br/> <i>Grant / Contract Purpose:</i> Research</p> |                  |                  |

## Additional Questions

1. Are there other relationships or activities that readers could perceive to have influenced, or that give the appearance of potentially influencing, what you wrote in the submitted work?

No.

2. What is the manuscript title?

Six Months Follow-up of a Fourth BNT162b2 Vaccine Dose

3. Are you the corresponding author?

No.

## Certification

I certify that the information provided in this disclosure is complete and accurate.

**Discloser Identifier:** 634129

**Disclosure Purpose:** 22-11283

## Summary of Interests

I do not have any interests to disclose at this time.

## Additional Questions

**1. Are there other relationships or activities that readers could perceive to have influenced, or that give the appearance of potentially influencing, what you wrote in the submitted work?**

No.

**2. What is the manuscript title?**

Six Months Follow-up of a Fourth BNT162b2 Vaccine Dose

**3. Are you the corresponding author?**

No.

## Certification

I certify that the information provided in this disclosure is complete and accurate.

**Discloser Identifier:** 1092283

**Disclosure Purpose:** 22-11283

## Summary of Interests

I do not have any interests to disclose at this time.

## Additional Questions

1. **Are there other relationships or activities that readers could perceive to have influenced, or that give the appearance of potentially influencing, what you wrote in the submitted work?**

No.

2. **What is the manuscript title?**

Six months follow-up of a fourth BNT126b2 vaccine dose

3. **Are you the corresponding author?**

No.

## Certification

I certify that the information provided in this disclosure is complete and accurate.

Discloser Identifier: 942462

Disclosure Purpose: 22-11283

## Summary of Interests

### Company or Organization

| Entity                                                                                                                                                         | Type             | Interest Held By |
|----------------------------------------------------------------------------------------------------------------------------------------------------------------|------------------|------------------|
| AstraZeneca                                                                                                                                                    | Consultant       | Self             |
| <i>Category:</i> Consultant<br><i>Description:</i> Meeting on Vaccine AE<br><i>Additional Information:</i>                                                     |                  |                  |
| Merck                                                                                                                                                          | Consultant       | Self             |
| <i>Category:</i> Consultant<br><i>Description:</i> Lecture on Merck Asia-Pacific Webinar<br><i>Additional Information:</i>                                     |                  |                  |
| Moderna                                                                                                                                                        | Grant / Contract | Self             |
| <i>Recipient Name:</i> Sheba Medical Center<br><i>Grant / Contract Description:</i> Study on Bivalent vaccine<br><i>Additional Information:</i>                |                  |                  |
| <i>Recipient Type:</i> Institution<br><i>Grant / Contract Purpose:</i> Research                                                                                |                  |                  |
| Moderna                                                                                                                                                        | Consultant       | Self             |
| <i>Category:</i> Consultant<br><i>Description:</i> Advisory board<br><i>Additional Information:</i>                                                            |                  |                  |
| Pfizer                                                                                                                                                         | Grant / Contract | Self             |
| <i>Recipient Name:</i> Gili Regev-Yochay<br><i>Grant / Contract Description:</i> Pneumococcal Disease / COVID vaccine<br><i>Additional Information:</i>        |                  |                  |
| <i>Recipient Type:</i> Institution<br><i>Grant / Contract Purpose:</i> Research                                                                                |                  |                  |
| Pfizer                                                                                                                                                         | Consultant       | Self             |
| <i>Category:</i> Consultant<br><i>Description:</i> Honoraria for giving a talk on vaccination of immunosuppressed population<br><i>Additional Information:</i> |                  |                  |

## Additional Questions

- Are there other relationships or activities that readers could perceive to have influenced, or that give the appearance of potentially influencing, what you wrote in the submitted work?

No.

**2. What is the manuscript title?**

Six Months Follow-up of a Fourth BNT162b2 Vaccine Dose

**3. Are you the corresponding author?**

Yes.

**a. Please list the other authors' names here.**

Michal Canetti<sup>1</sup>, MD; Noam Barda<sup>1</sup>, MD, PhD; Mayan Gilboa<sup>1</sup>, MD; Victoria Indenbaum<sup>2</sup>, PhD; Keren Asraf<sup>1</sup>, PhD; Tal Gonen<sup>1</sup>, MD; Yael Weiss-Ottolenghi<sup>1</sup>, PhD; Sharon Amit<sup>1</sup>, MD; Ram Doolman<sup>1</sup>, MD; Ella Mendelson<sup>2</sup>, PhD; Laurence S Freedman<sup>1</sup>, PhD; Yitshak Kreiss<sup>1</sup>, MD; Yaniv Lustig<sup>2</sup>, PhD; and Gili Regev-Yochay<sup>1</sup>, MD

## Certification

I certify that the information provided in this disclosure is complete and accurate.

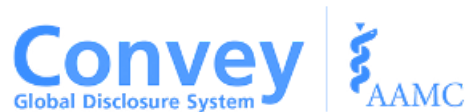

Supplement: NEJMc2211283_disclosures.pdf [file NEJMc2211283_disclosures.pdf]
